# Supplementary material for: Origin of muscle satellite cells in the Xenopus embryo
Source: Oxford University Press journal article supplement (doi:10.1242/dev.056481), 2011-01-27
Supplement: dev056481tables1.pdf [file dev056481tables1.pdf]

**Table S1. PCR primers**

| Gene        | Temperature (°C) | Forward primer              | Reverse primer              |
|-------------|------------------|-----------------------------|-----------------------------|
| <i>Pax7</i> | 57               | 5'-TCAATAATGGTCTCTCCCCGC-3' | 5'-TTGCCAGGTAATCAACAGCGG-3' |
| <i>Pax3</i> | 57               | 5'-ATTCAACCACCTGATTCCAGG-3' | 5'-GCCTGTGAACTGTGTTGCTTG-3' |
| <i>Myf5</i> | 52               | 5'-CTATTCAGAATGGAGATGGT-3'  | 5'-GTCTTGGAGACTCTCAATA-3'   |
| <i>MyoD</i> | 58               | 5'-ACATGGAAGTCATGAGGGAT-3'  | 5'-AAGAGTCACGTGCACCAGCCT-3' |
| <i>Odc</i>  | 55               | 5'-ACACGGCATTGATCCTACAG-3'  | 5'-AGCTCCTTCGGTGTAATGAC-3'  |
