# Supplementary material for: Origin of muscle satellite cells in the Xenopus embryo
Source: Oxford University Press journal article supplement (doi:10.1242/dev.056481), 2011-01-27
Supplement: dev056481tables2.pdf [file dev056481tables2.pdf]

**Table S2. Distribution of RDA after 32-cell stage injection**

|                    |          | <b>Stage 16</b>   |                           |              |                          |         |
|--------------------|----------|-------------------|---------------------------|--------------|--------------------------|---------|
| RDA injection site | <i>n</i> | Paraxial labeling | Paraxial and dorsolateral | Dorsolateral | Dorsolateral and ventral | Ventral |
| C3                 | 56       | 47(84.0%)         | 9 (16.0%)                 | 0            | 0                        | 0       |
| C4                 | 50       | 0                 | 0                         | 34 (68.0%)   | 16 (32.0%)               | 0       |

  

|                    |          | <b>Stage 32</b>          |                    |                               |                     |
|--------------------|----------|--------------------------|--------------------|-------------------------------|---------------------|
| RDA injection site | <i>n</i> | Dorsal and middle somite | Middle somite only | Dorsalmost and ventral somite | Ventral somite only |
| C3                 | 43       | 43 (100%)                | 0                  | 0                             | 0                   |
| C4                 | 30       | 0                        | 0                  | 20 (66.7%)                    | 10 (33.3%)          |
