# Supplementary material for: Origin of muscle satellite cells in the Xenopus embryo
Source: Oxford University Press journal article supplement (doi:10.1242/dev.056481), 2011-01-27
Supplement: dev056481tables3.pdf [file dev056481tables3.pdf]

**Table S3. Ectopic gene expression induced by *Pax7* mRNA injection at 32-cell stage**

|          | <i>Pax7</i> mRNA C3 injection |             |             | <i>Pax7</i> mRNA C4 injection |             |             |
|----------|-------------------------------|-------------|-------------|-------------------------------|-------------|-------------|
|          | <i>Myf5</i>                   | <i>MyoD</i> | <i>Pax3</i> | <i>Myf5</i>                   | <i>MyoD</i> | <i>Pax3</i> |
| Stage 16 | 23 (88.5%)                    | 0           | 20 (87.0%)  | 0                             | 0           | 18 (72%)    |
| Stage 32 | 35 (87.5%)                    | 0           | 31 (88.6%)  | 0                             | 0           | 17 (65.4%)  |
