# Supplementary material for: Origin of muscle satellite cells in the Xenopus embryo
Source: Oxford University Press journal article supplement (doi:10.1242/dev.056481), 2011-01-27
Supplement: dev056481tables4.pdf [file dev056481tables4.pdf]

**Table S4. Candidate factors affecting satellite cell formation**

| Constructs    | Pax7 expression |
|---------------|-----------------|
| <i>Bmp4</i>   | +++             |
| <i>Msx1</i>   | +++             |
| <i>Fgf8</i>   | +++             |
| <i>Tbx6</i>   | +               |
| <i>Myf5</i>   | -               |
| <i>Pax7</i>   | -               |
| <i>Pax3</i>   | -               |
| <i>Wnt8</i>   | -               |
| <i>Wnt3a</i>  | -               |
| <i>GSK3B</i>  | -               |
| <i>Notch1</i> | -               |
| <i>NICD</i>   | -               |

Candidate factor mRNA (100 pg) was injected into both blastomeres of two-cell stage embryo. Animal caps were collected at stage 8-9, induced with FGF2 and cultured for 5 days. (+) or (-) refers to the expression level of *Pax7* by RT-PCR compared with control caps.
